# Supplementary material for: A trace fossil made by a walking crayfish or crayfish-like arthropod from the Lower Jurassic Moenave Formation of southwestern Utah, USA
Source: PeerJ. 2021 Jan 26;9:e10640. doi: 10.7717/peerj.10640 (PMC7845529; doi:10.7717/peerj.10640)
Supplement: Supplemental Information 1 — Measurements were made on identical numbers of consecutive sets of tracks in each specimen. [file peerj-09-10640-s001.xlsx]

## Sheet: Sheet1
Specimen/ Ichnotaxon	Paramedial Impression Internal Width (IIW)	Track to Paramedial Impression Distance (TTI)	Ratio TTI/IIW	Mean Ratio
SGDS 1290	4.7	1.8	0.382979
SGDS 1290	5.9	1.5	0.254237
SGDS 1290	5.8	0	0
SGDS 1290	8.1	0	0
SGDS 1290	4.2	3	0.714286
SGDS 1290	5.4	4.2	0.777778
SGDS 1290	6.5	2.4	0.369231
SGDS 1290	6.9	0	0	0.312314
Siskemia latavia GSE 14081	5.6	5.5	0.982143
Siskemia latavia GSE 14081	6.1	4.2	0.688525
Siskemia latavia GSE 14081	6.9	2.6	0.376812
Siskemia latavia GSE 14081	6.7	1	0.149254
Siskemia latavia GSE 14081	6.7	9.4	1.40299
Siskemia latavia GSE 14081	6.7	6.4	0.955224
Siskemia latavia GSE 14081	7.4	7.6	1.02703	0.797424
Siskemia latavia GSE 14081		12	#DIV/0!
Siskemia bipediculus GSE 13329	3.9	4.6	1.17949
Siskemia bipediculus GSE 13329	3.4	5.8	1.70588
Siskemia bipediculus GSE 13329	4	6.6	1.65
Siskemia bipediculus GSE 13329	3.7	5.9	1.59459
Siskemia bipediculus GSE 13329	4	4.6	1.15
Siskemia bipediculus GSE 13329	3.8	5.3	1.39474
Siskemia bipediculus GSE 13329	4.1	4.4	1.07317
Siskemia bipediculus GSE 13329	3.8	3.8	1	1.34348
Siskemia elegans GSE 14127	1	2.2	2.2
Siskemia elegans GSE 14127	1.1	0	0
Siskemia elegans GSE 14127	1.1	2.8	2.54545
Siskemia elegans GSE 14127	1	0.6	0.6
Siskemia elegans GSE 14127	0.9	2.3	2.55556
Siskemia elegans GSE 14127	1	1.6	1.6
Siskemia elegans GSE 14127	0.8	1.1	1.375
Siskemia elegans GSE 14127	0.8	2.5	3.125	1.75013
GSE = British Geological Survey, Edinburgh, Scotland; SGDS = St. George Dinosaur Discovery Site at Johnson Farm, St. George, Utah, USA
